# Supplementary material for: A chromatography-free total synthesis of a ferrocene-containing dendrimer exhibiting the property of recognizing 9,10-diphenylanthracene
Source: Royal Society of Chemistry journal article supplement (doi:10.1039/d0dt04261g), 2021-01-01
Supplement: d0dt04261g1.pdf [file d0dt04261g1.pdf]

## Electronic Supporting Information (ESI)

### **A chromatography-free total synthesis of a $\pi$ -conjugated ferrocene-containing dendrimer exhibiting the property to recognize 9,10-diphenylantracene**

Artur Kasprzak<sup>a\*</sup>, Monika K. Nisiewicz<sup>a,b</sup>, Anna M. Nowicka<sup>b</sup>

<sup>a</sup> Faculty of Chemistry, Warsaw University of Technology, Noakowskiego Str. 3, 00-664 Warsaw, Poland

\* e-mail: [akasprzak@ch.pw.edu.pl](mailto:akasprzak@ch.pw.edu.pl)

<sup>b</sup> Faculty of Chemistry, University of Warsaw, Pasteura Str. 1, 02-093 Warsaw, Poland

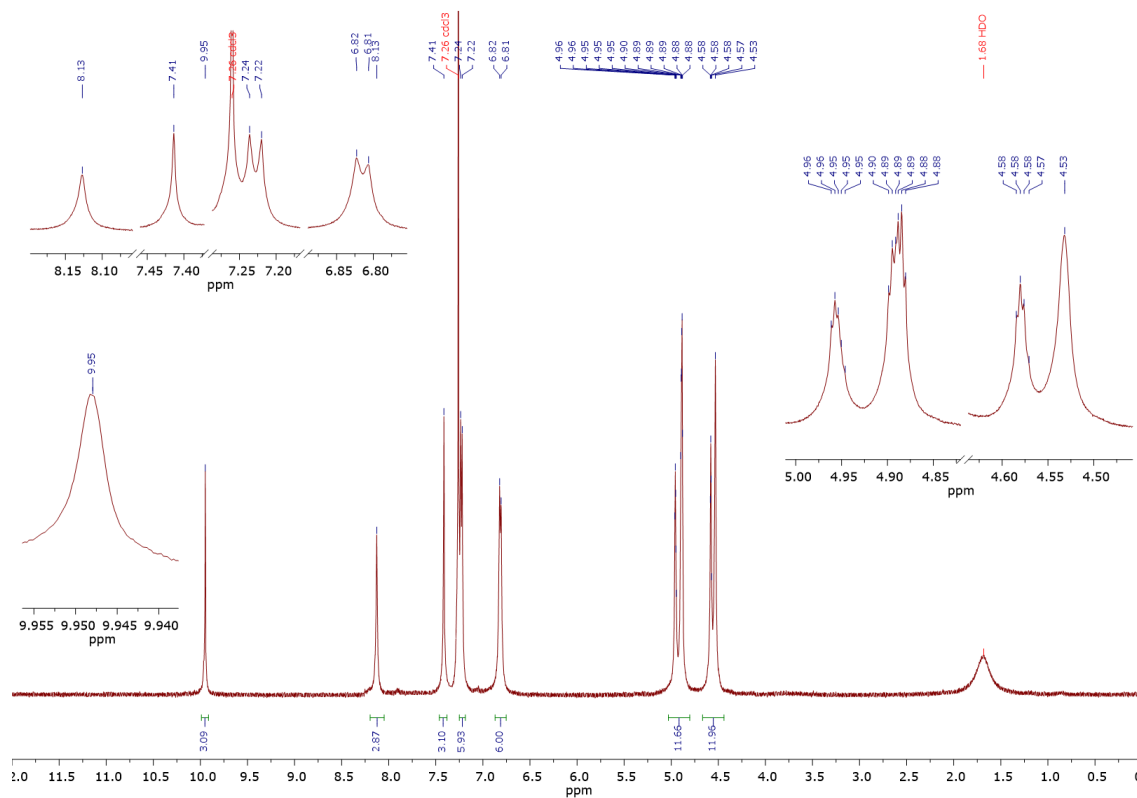

**Figure S1.**  $^1\text{H}$  NMR ( $\text{CDCl}_3$ , 500 MHz) spectrum of **1**.

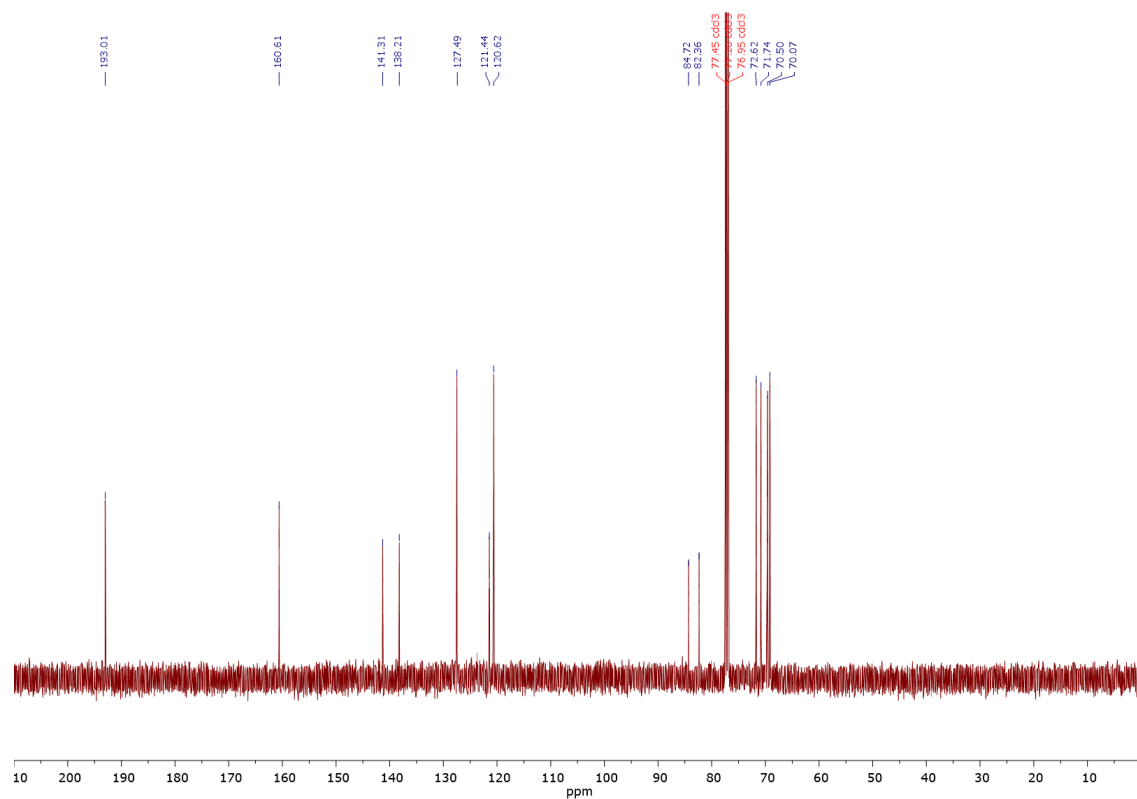

**Figure S2.**  $^{13}\text{C}$  NMR ( $\text{CDCl}_3$ , 125 MHz) spectrum of **1**.

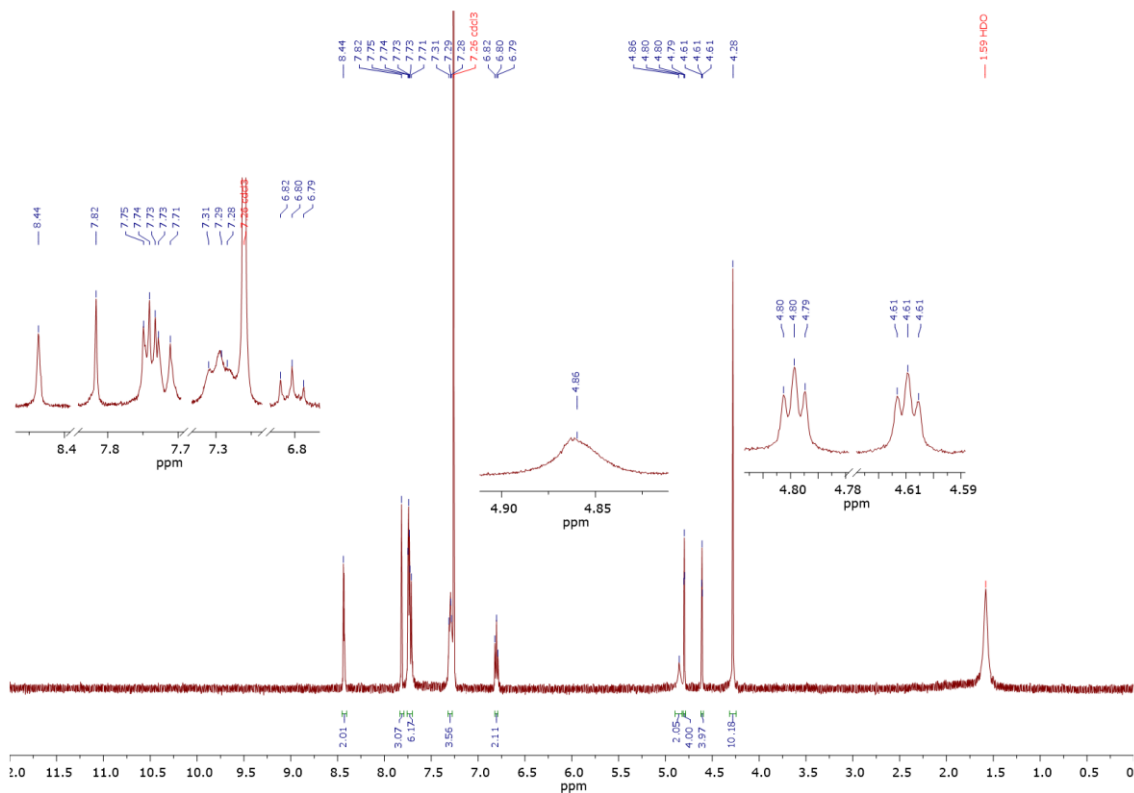

**Figure S3.**  $^1\text{H}$  NMR ( $\text{CDCl}_3$ , 500 MHz) spectrum of **2**.

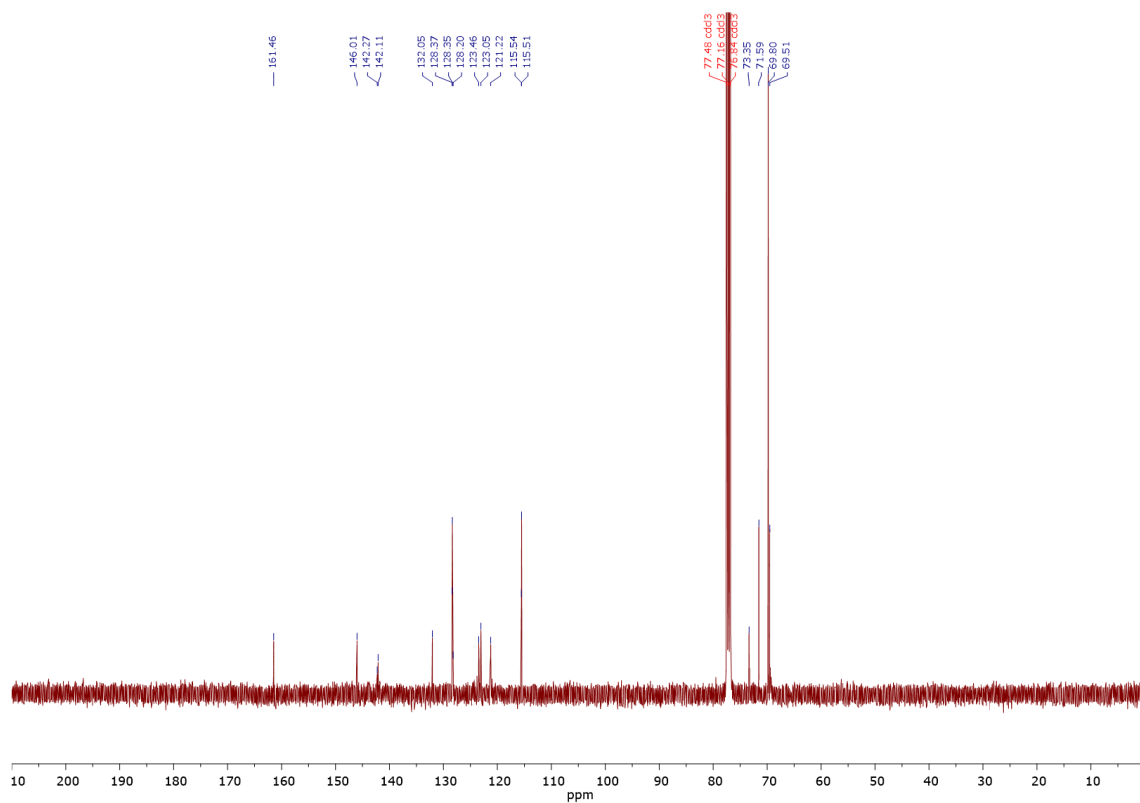

**Figure S4.**  $^{13}\text{C}$  NMR ( $\text{CDCl}_3$ , 125 MHz) spectrum of **2**.





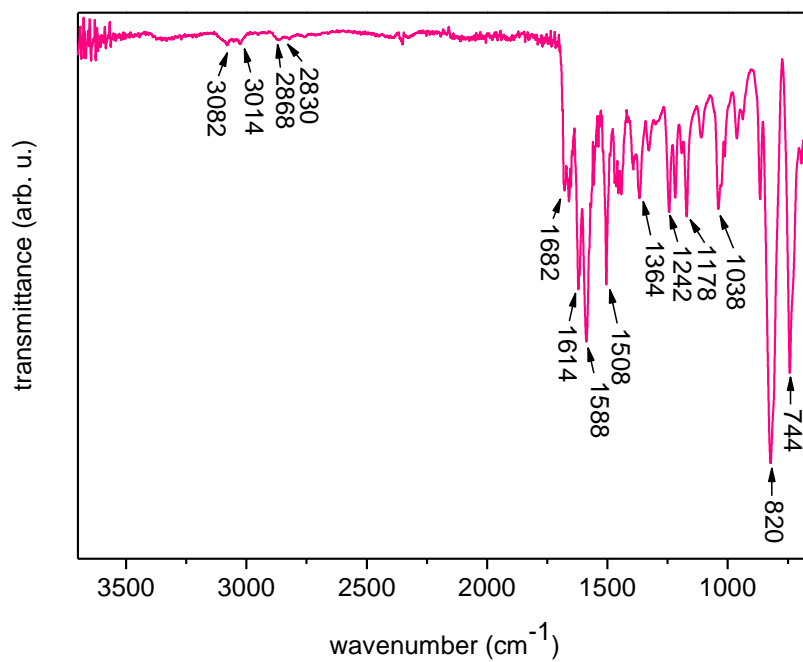

**Figure S9.** FT-IR (ATR) spectrum of **1**.

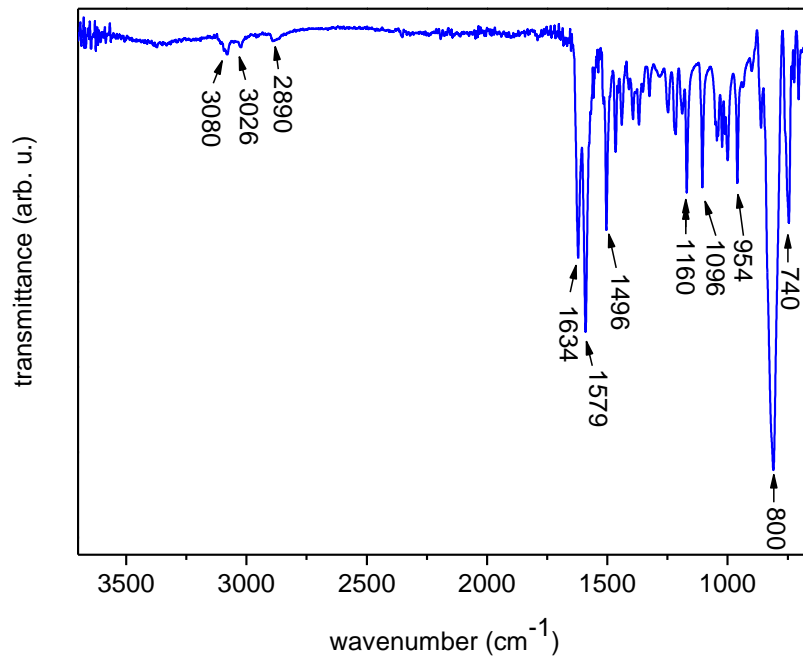

**Figure S10.** FT-IR (ATR) spectrum of **2**.

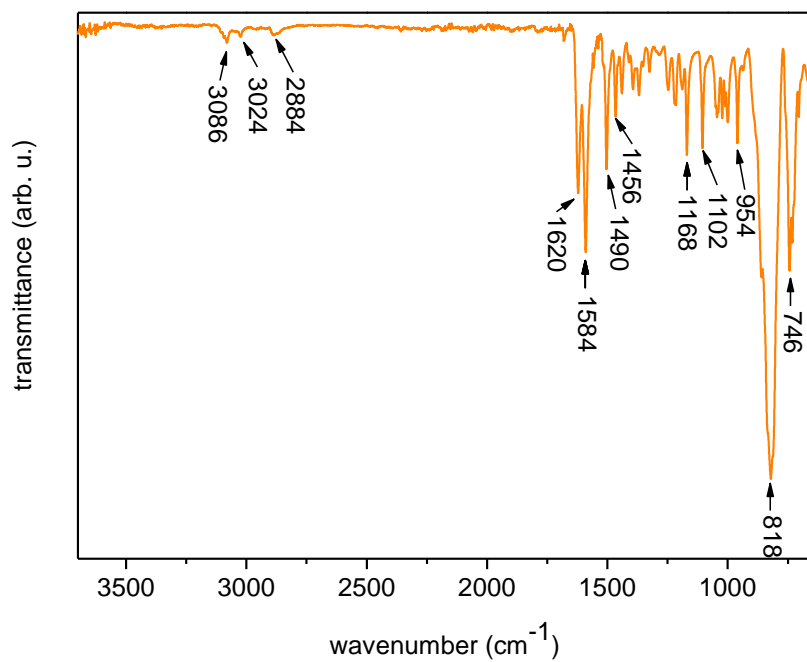

**Figure S11.** FT-IR (ATR) spectrum of **Fc-den**.

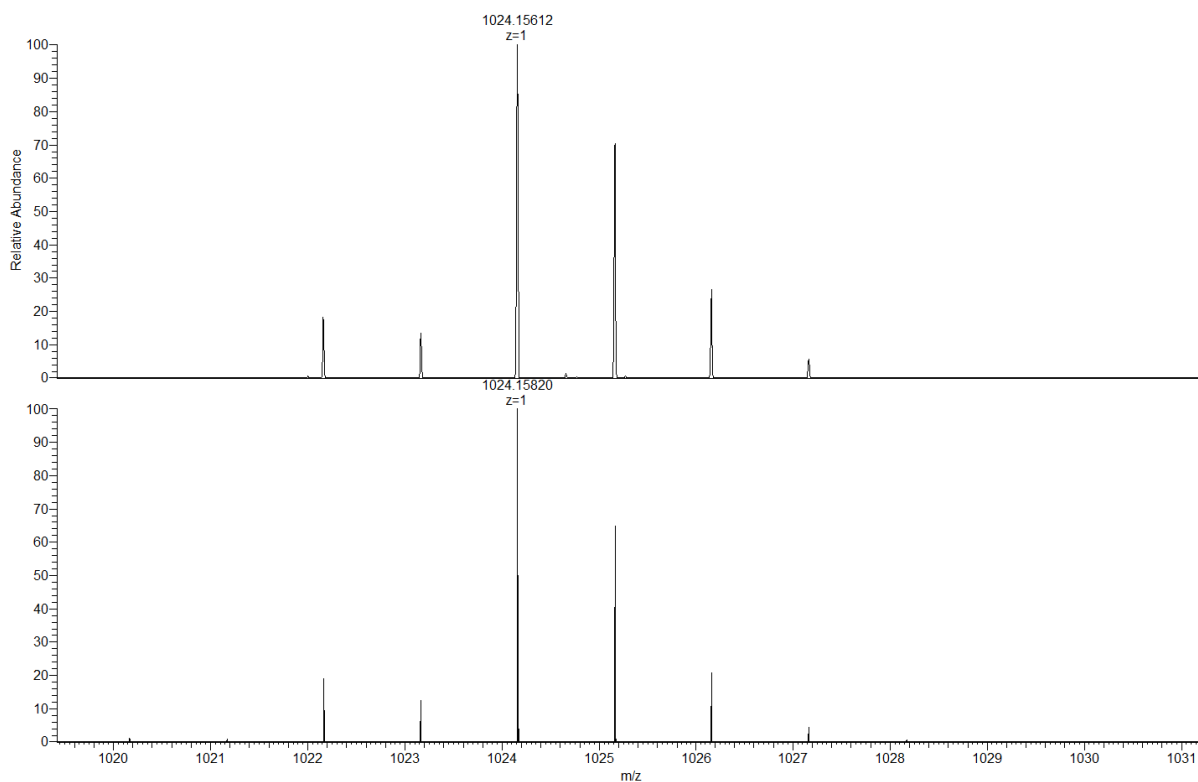

**Figure S12.** HRMS (TOF) spectrum of **1** (top: measured, bottom: calculated).

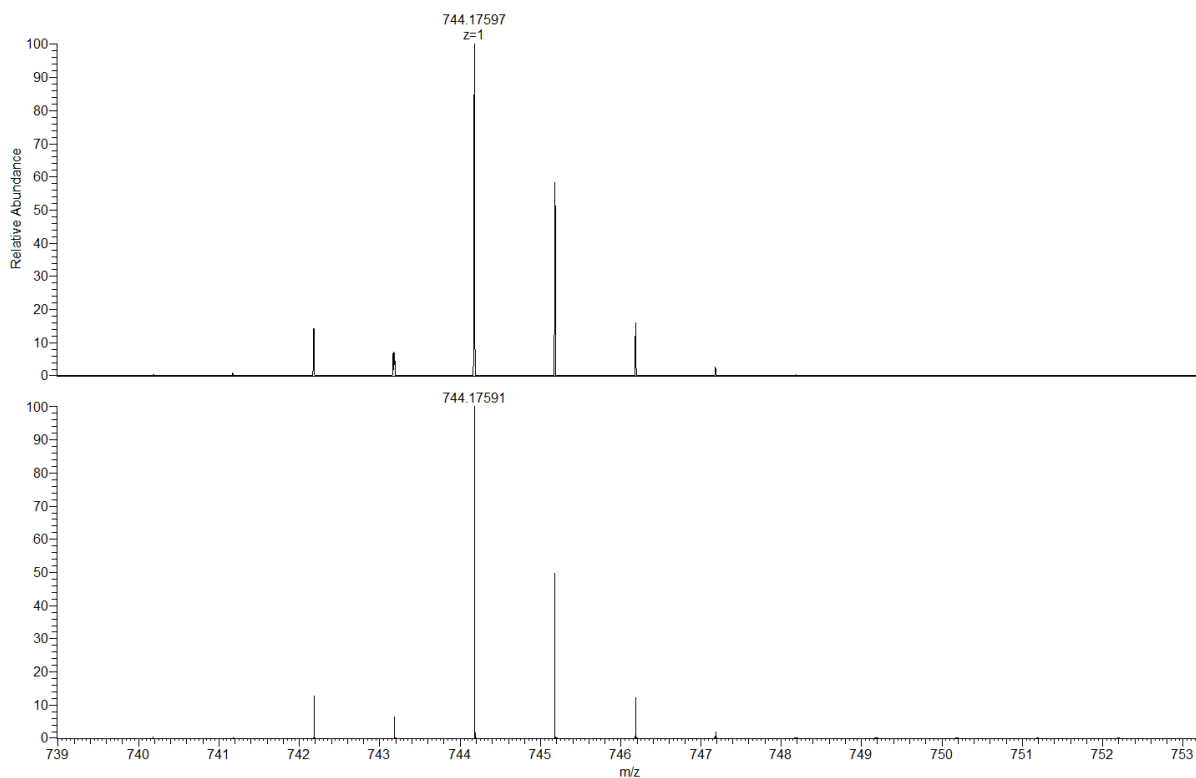

**Figure S13.** HRMS (TOF) spectrum of **2** (top: measured, bottom: calculated).

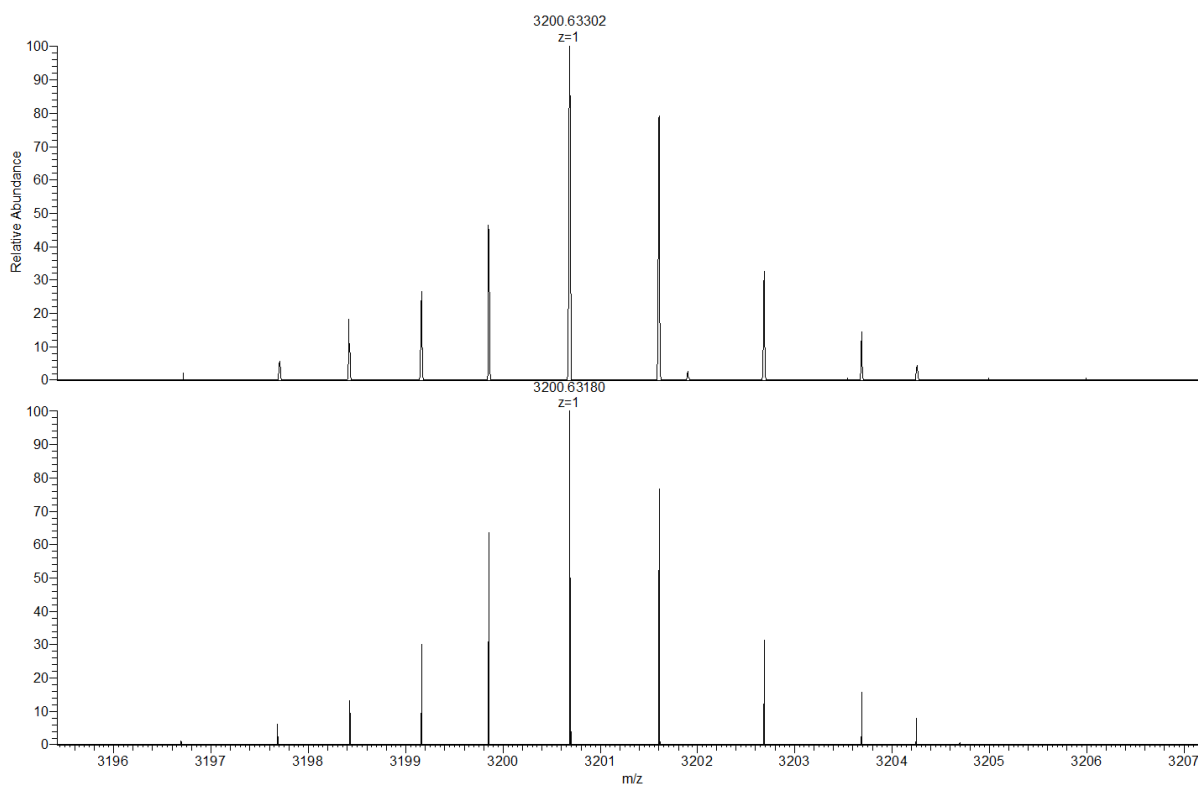

**Figure S14.** HRMS (TOF) spectrum of **Fc-den** (top: measured, bottom: calculated).



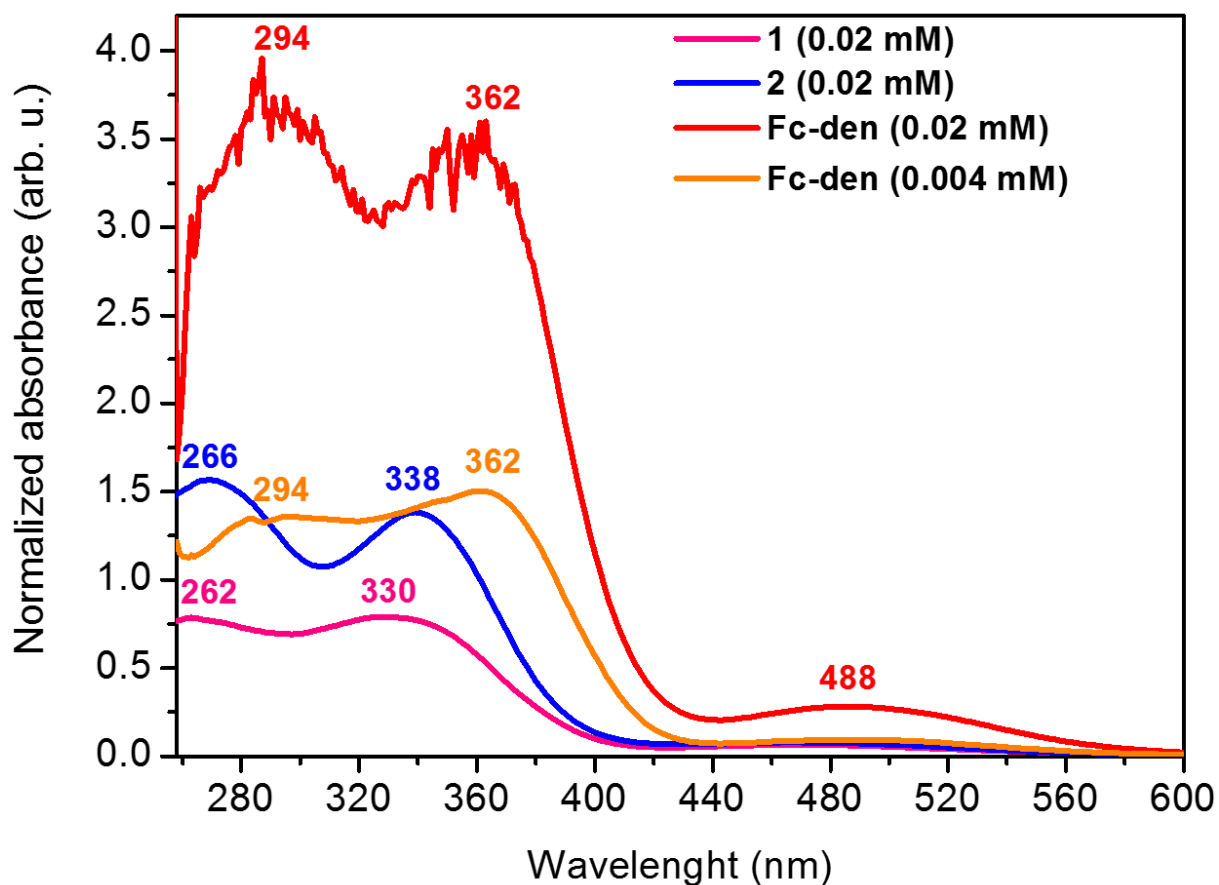

**Figure S15.** UV-Vis spectra ( $\text{CHCl}_3$ ) of **1**, **2** and **Fc-den**.

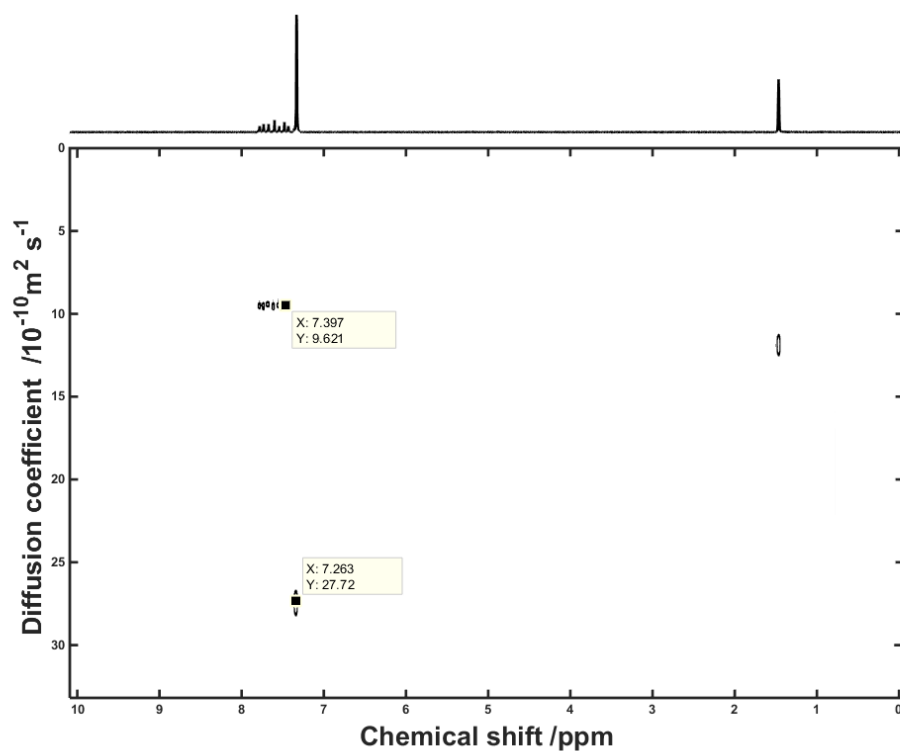

**Figure. S16.**  $^1\text{H}$  DOSY NMR ( $\text{CDCl}_3$ , 500 MHz, 10.0 mM) spectrum of native 9,10-diphenylanthracene.

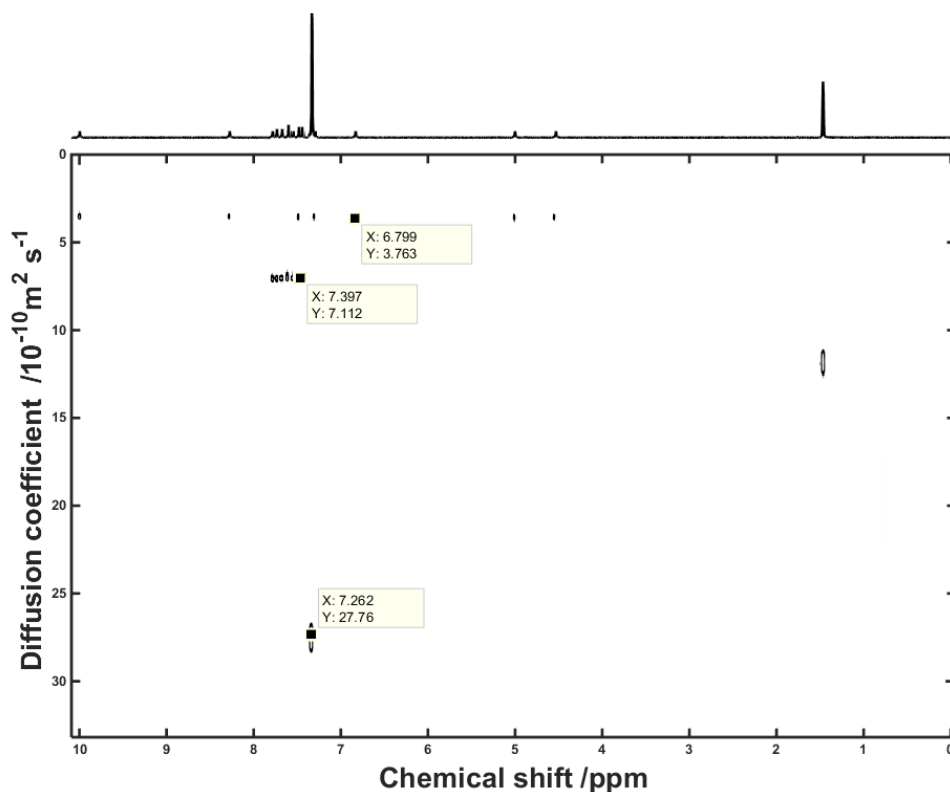

**Figure. S17.**  $^1\text{H}$  DOSY NMR ( $\text{CDCl}_3$ , 500 MHz, 10.0 mM) spectrum of 9,10-diphenylanthracene in the presence of compound **1** (10.0 mM).

**Table S1.** Calculation of  $K_{\text{app}}$  for the 9,10-diphenylanthracene:**1** non-covalent system. For the details of this methodology, see: A. Kasprzak, M. Koszytkowska-Stawińska, A. M. Nowicka, W. Buchowicz, M. Poplawska. *J. Org. Chem.*, **2019**, *84*, 15900–15914. Diffusion coefficient values are given in  $10^{-10} \text{ m}^2\text{s}^{-1}$ . Molar fraction of the bound 9,10-diphenylanthracene ( $x_b$ ) was calculated as follows:  $x_b = (D_{\text{free}} - D_{\text{obs}}) \cdot [(D_{\text{free}} - D_{\text{bound}})^{-1}]$ , where  $x_b$  is a molar fraction value of the bound 9,10-diphenylanthracene,  $D_{\text{free}}$  is a diffusion coefficient value for the native 9,10-diphenylanthracene,  $D_{\text{obs}}$  stands for a diffusion coefficient value for the 9,10-diphenylanthracene in the non-covalent system,  $D_{\text{bound}}$  is a diffusion coefficient value for compound **1** in the non-covalent system.  $K_{\text{app}}$  value was calculated as follows:  $K_{\text{app}} = x_b \cdot [(1 - x_b) \cdot (0.01 \text{ M} - x_b \cdot 0.01 \text{ M})]^{-1}$ , where  $K_{\text{app}}$  [ $\text{M}^{-1}$ ] is an apparent binding constant,  $x_b$  is a molar fraction of the 9,10-diphenylanthracene in the non-covalent system, 0.01 M is a concentration of 9,10-diphenylanthracene and compound **1** in the sample.

| $D_{\text{free}}$ | $D_{\text{obs}}$ | $D_{\text{bound}}$ | $x_b$ | $K_{\text{app}} [\text{M}^{-1}]$ |
|-------------------|------------------|--------------------|-------|----------------------------------|
| 9.621             | 7.112            | 3.763              | 0.428 | 131.045                          |

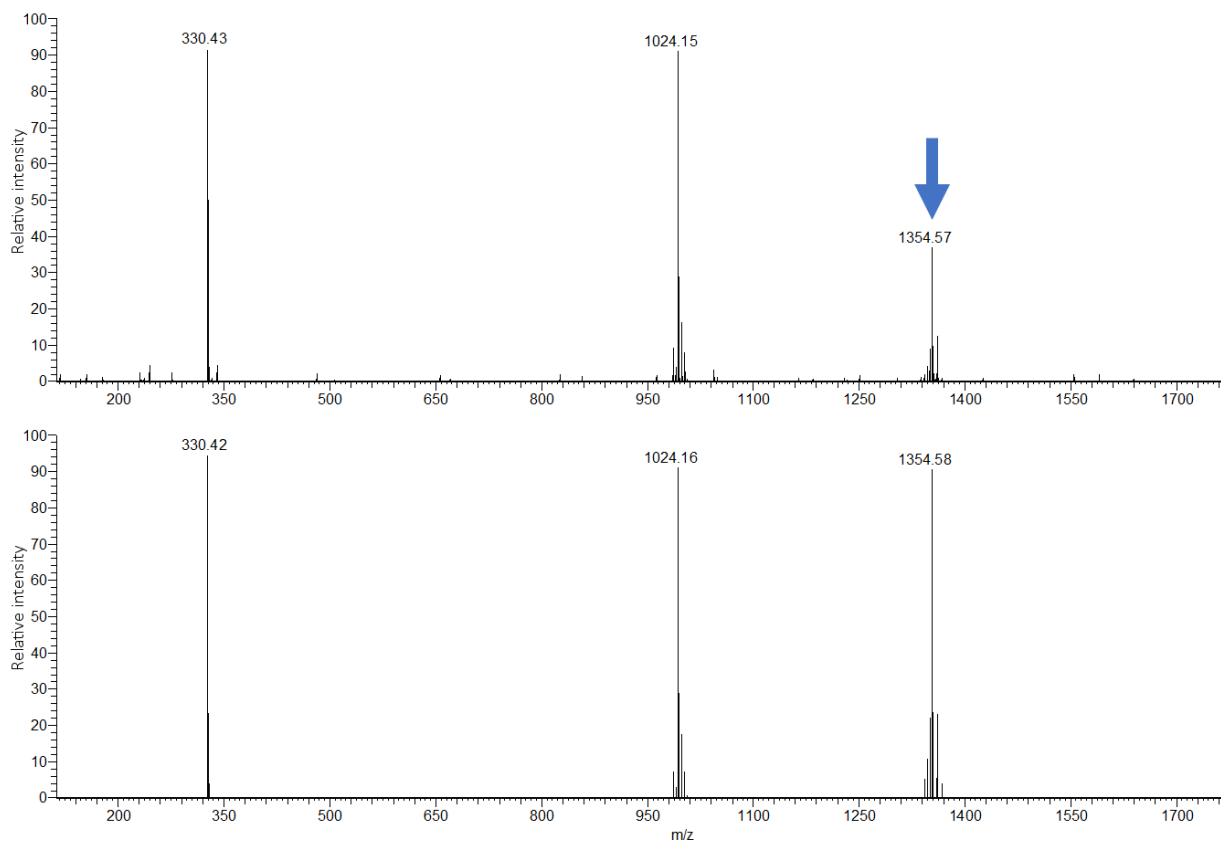

**Figure. S18.** Cold-spray ESI-MS spectrum of the 9,10-diphenylanthracene in the presence of 1 equiv of **1** (top: measured, bottom: calculated). The peak originating from the presence of 1:1 non-covalent system is marked with blue arrow.

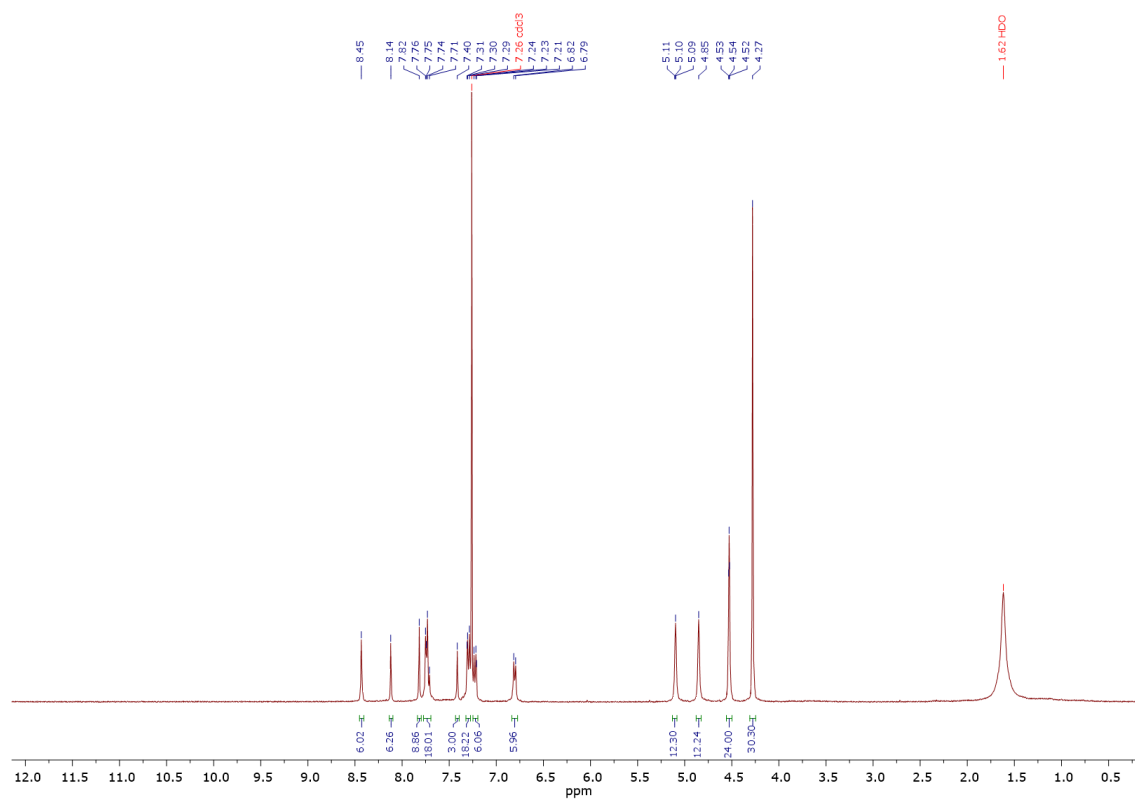

**Figure S19.**  $^1\text{H}$  NMR ( $\text{CDCl}_3$ , 500 MHz) spectrum of **Fc-den** after keeping the sample on air for 3 months.

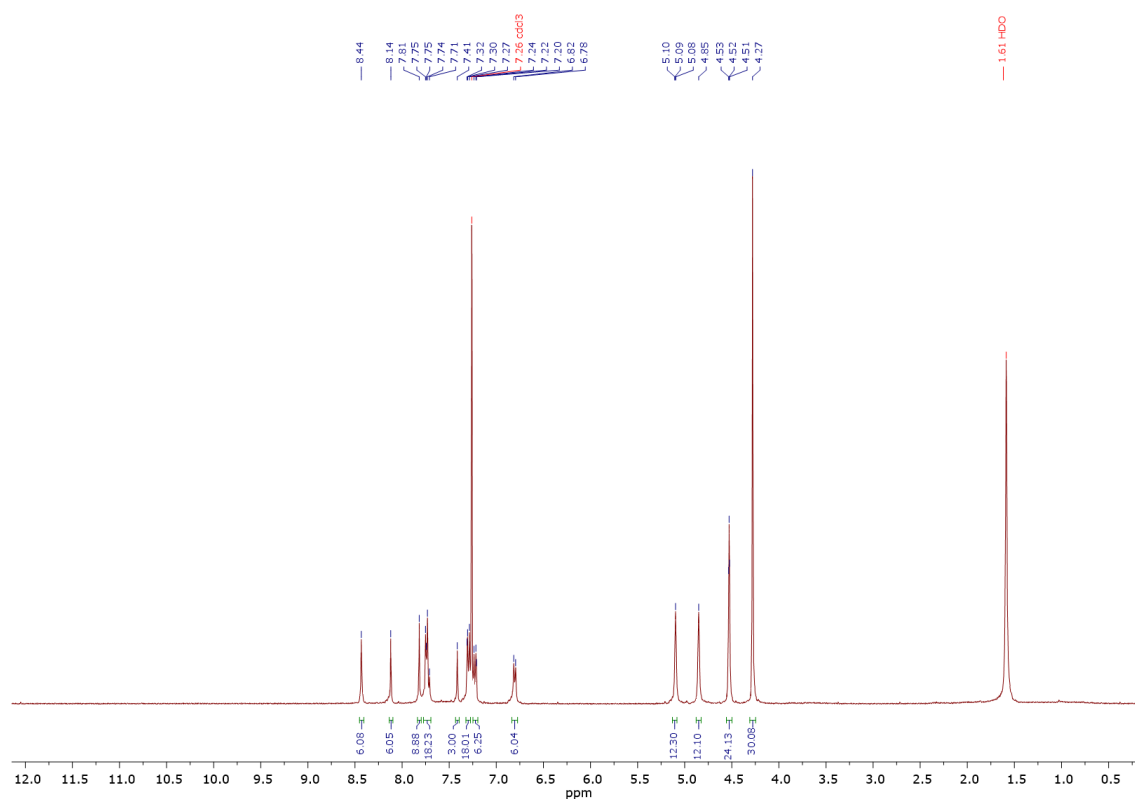

**Figure S20.**  $^1\text{H}$  NMR ( $\text{CDCl}_3$ , 500 MHz) spectrum of **Fc-den** after the treatment with water (solid **Fc-den** was shaken in distilled water for 6 hours, filtered, washed with methanol, dried under high vacuum and  $^1\text{H}$  NMR spectrum was acquired).
